# Supplementary material
Source: publisher site journal article supplement (https://www.dovepress.com/article/586382)
Supplement: Supplementary file 1 [file 586382%20Supplementary%20Materials%20for%20corrections_2_1.doc]

**
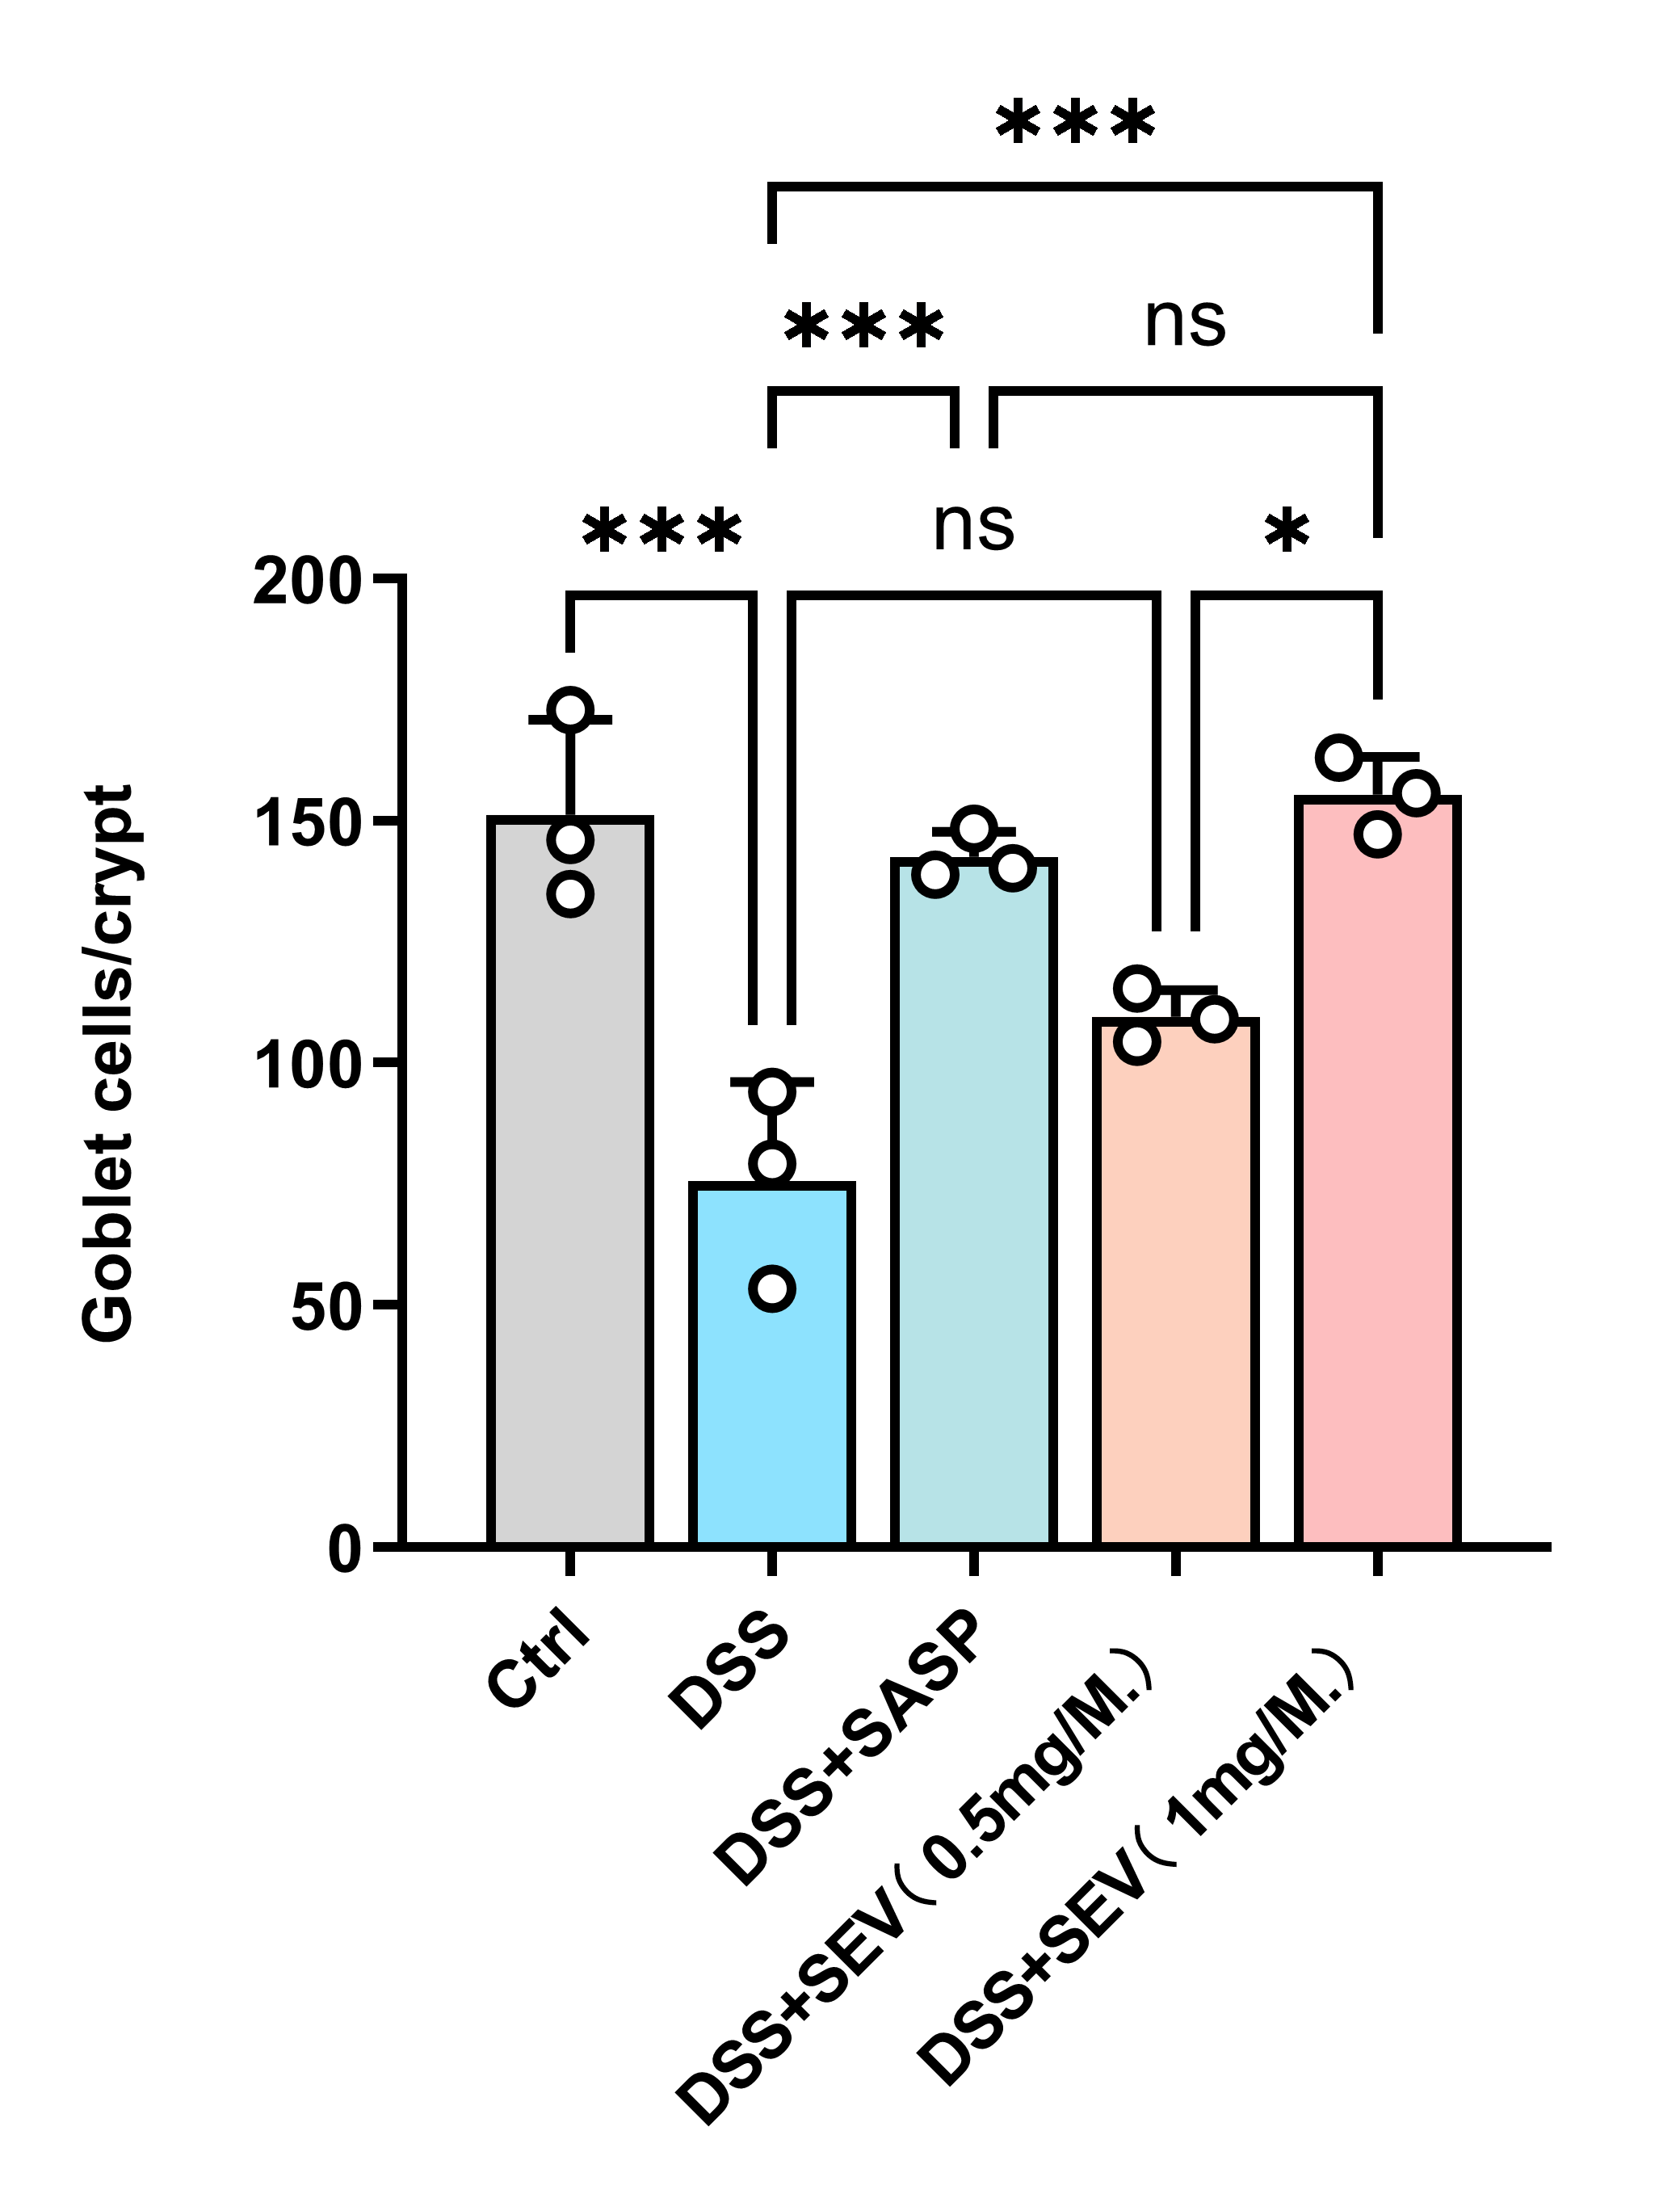
**

**Fig. S1** Quantification of goblet cell numbers in the crypt (n=3). Data are expressed as mean ± SD. Statistical significance was determined by one‑way ANOVA followed by Tukey’s post hoc test; ns *p* > 0.05, **p* < 0.05, ****p* < 0.001.

**
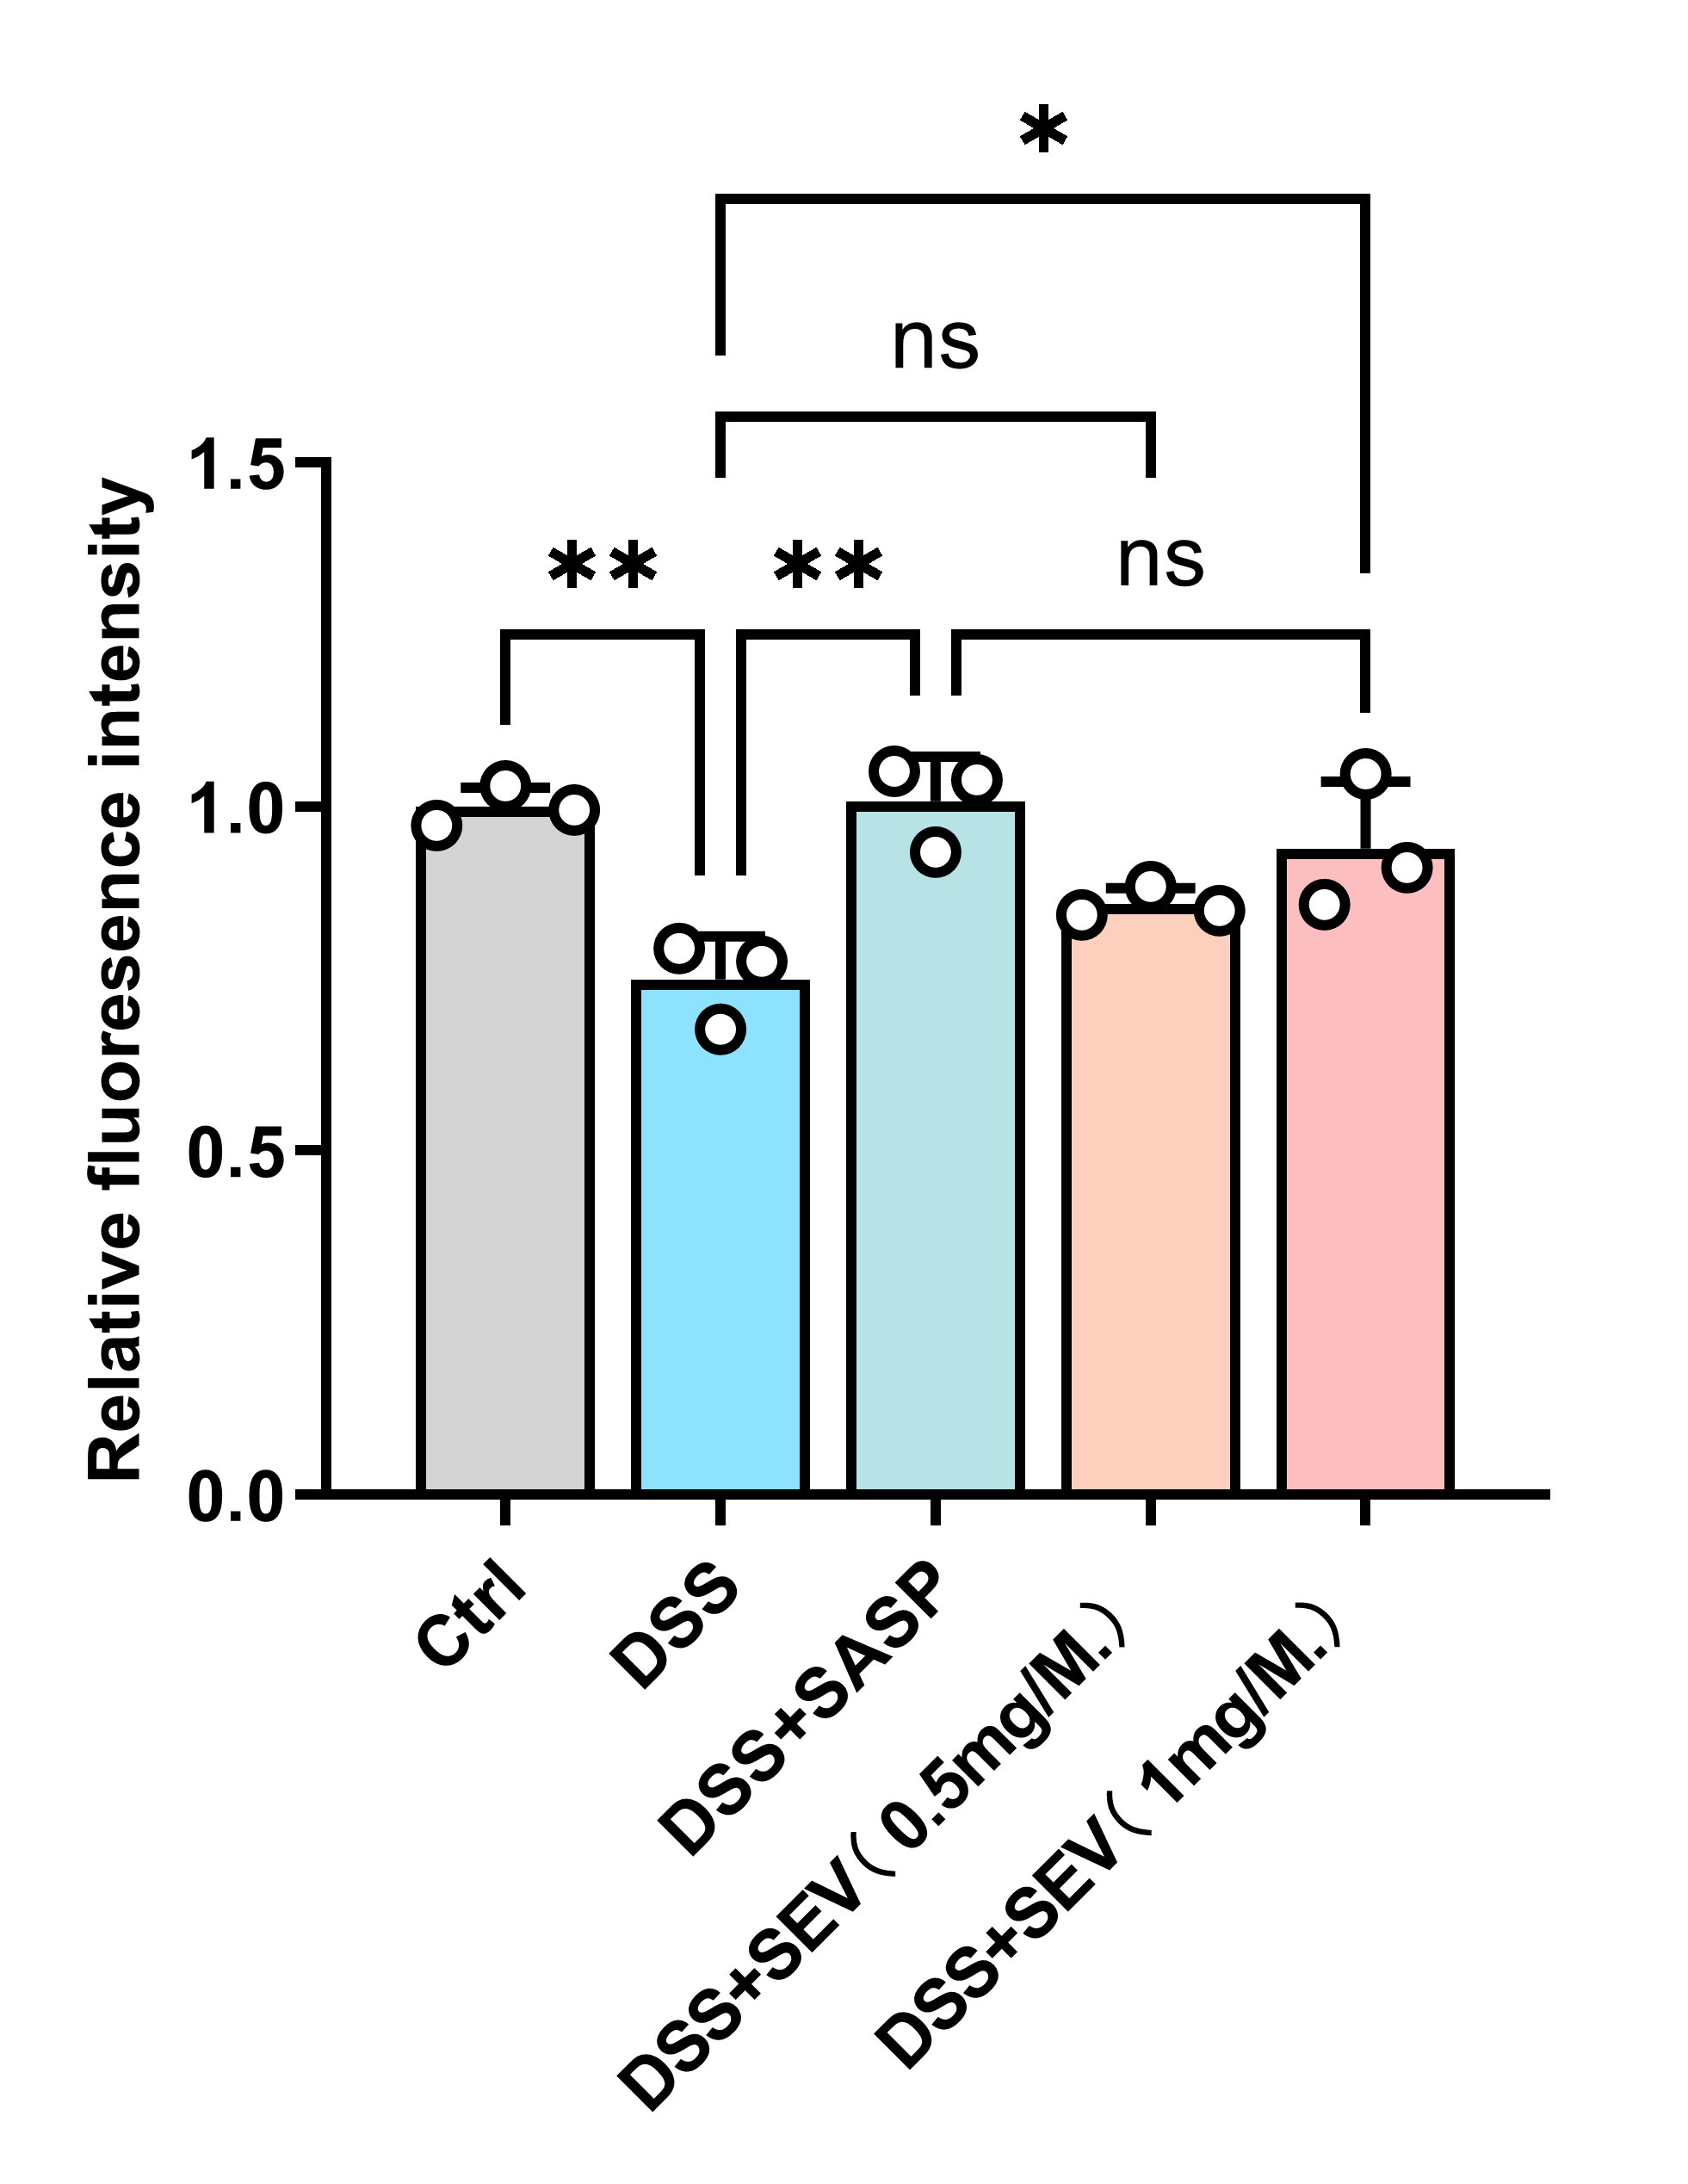
**

**Fig. S2** Quantification of MUC2 expression in colonic tissues of IBD mice by ImageJ software (n=3). Data are expressed as mean ± SD. Statistical significance was determined by one‑way ANOVA followed by Tukey’s post hoc test; ns *p* > 0.05, **p* < 0.05, ***p* < 0.01.

**
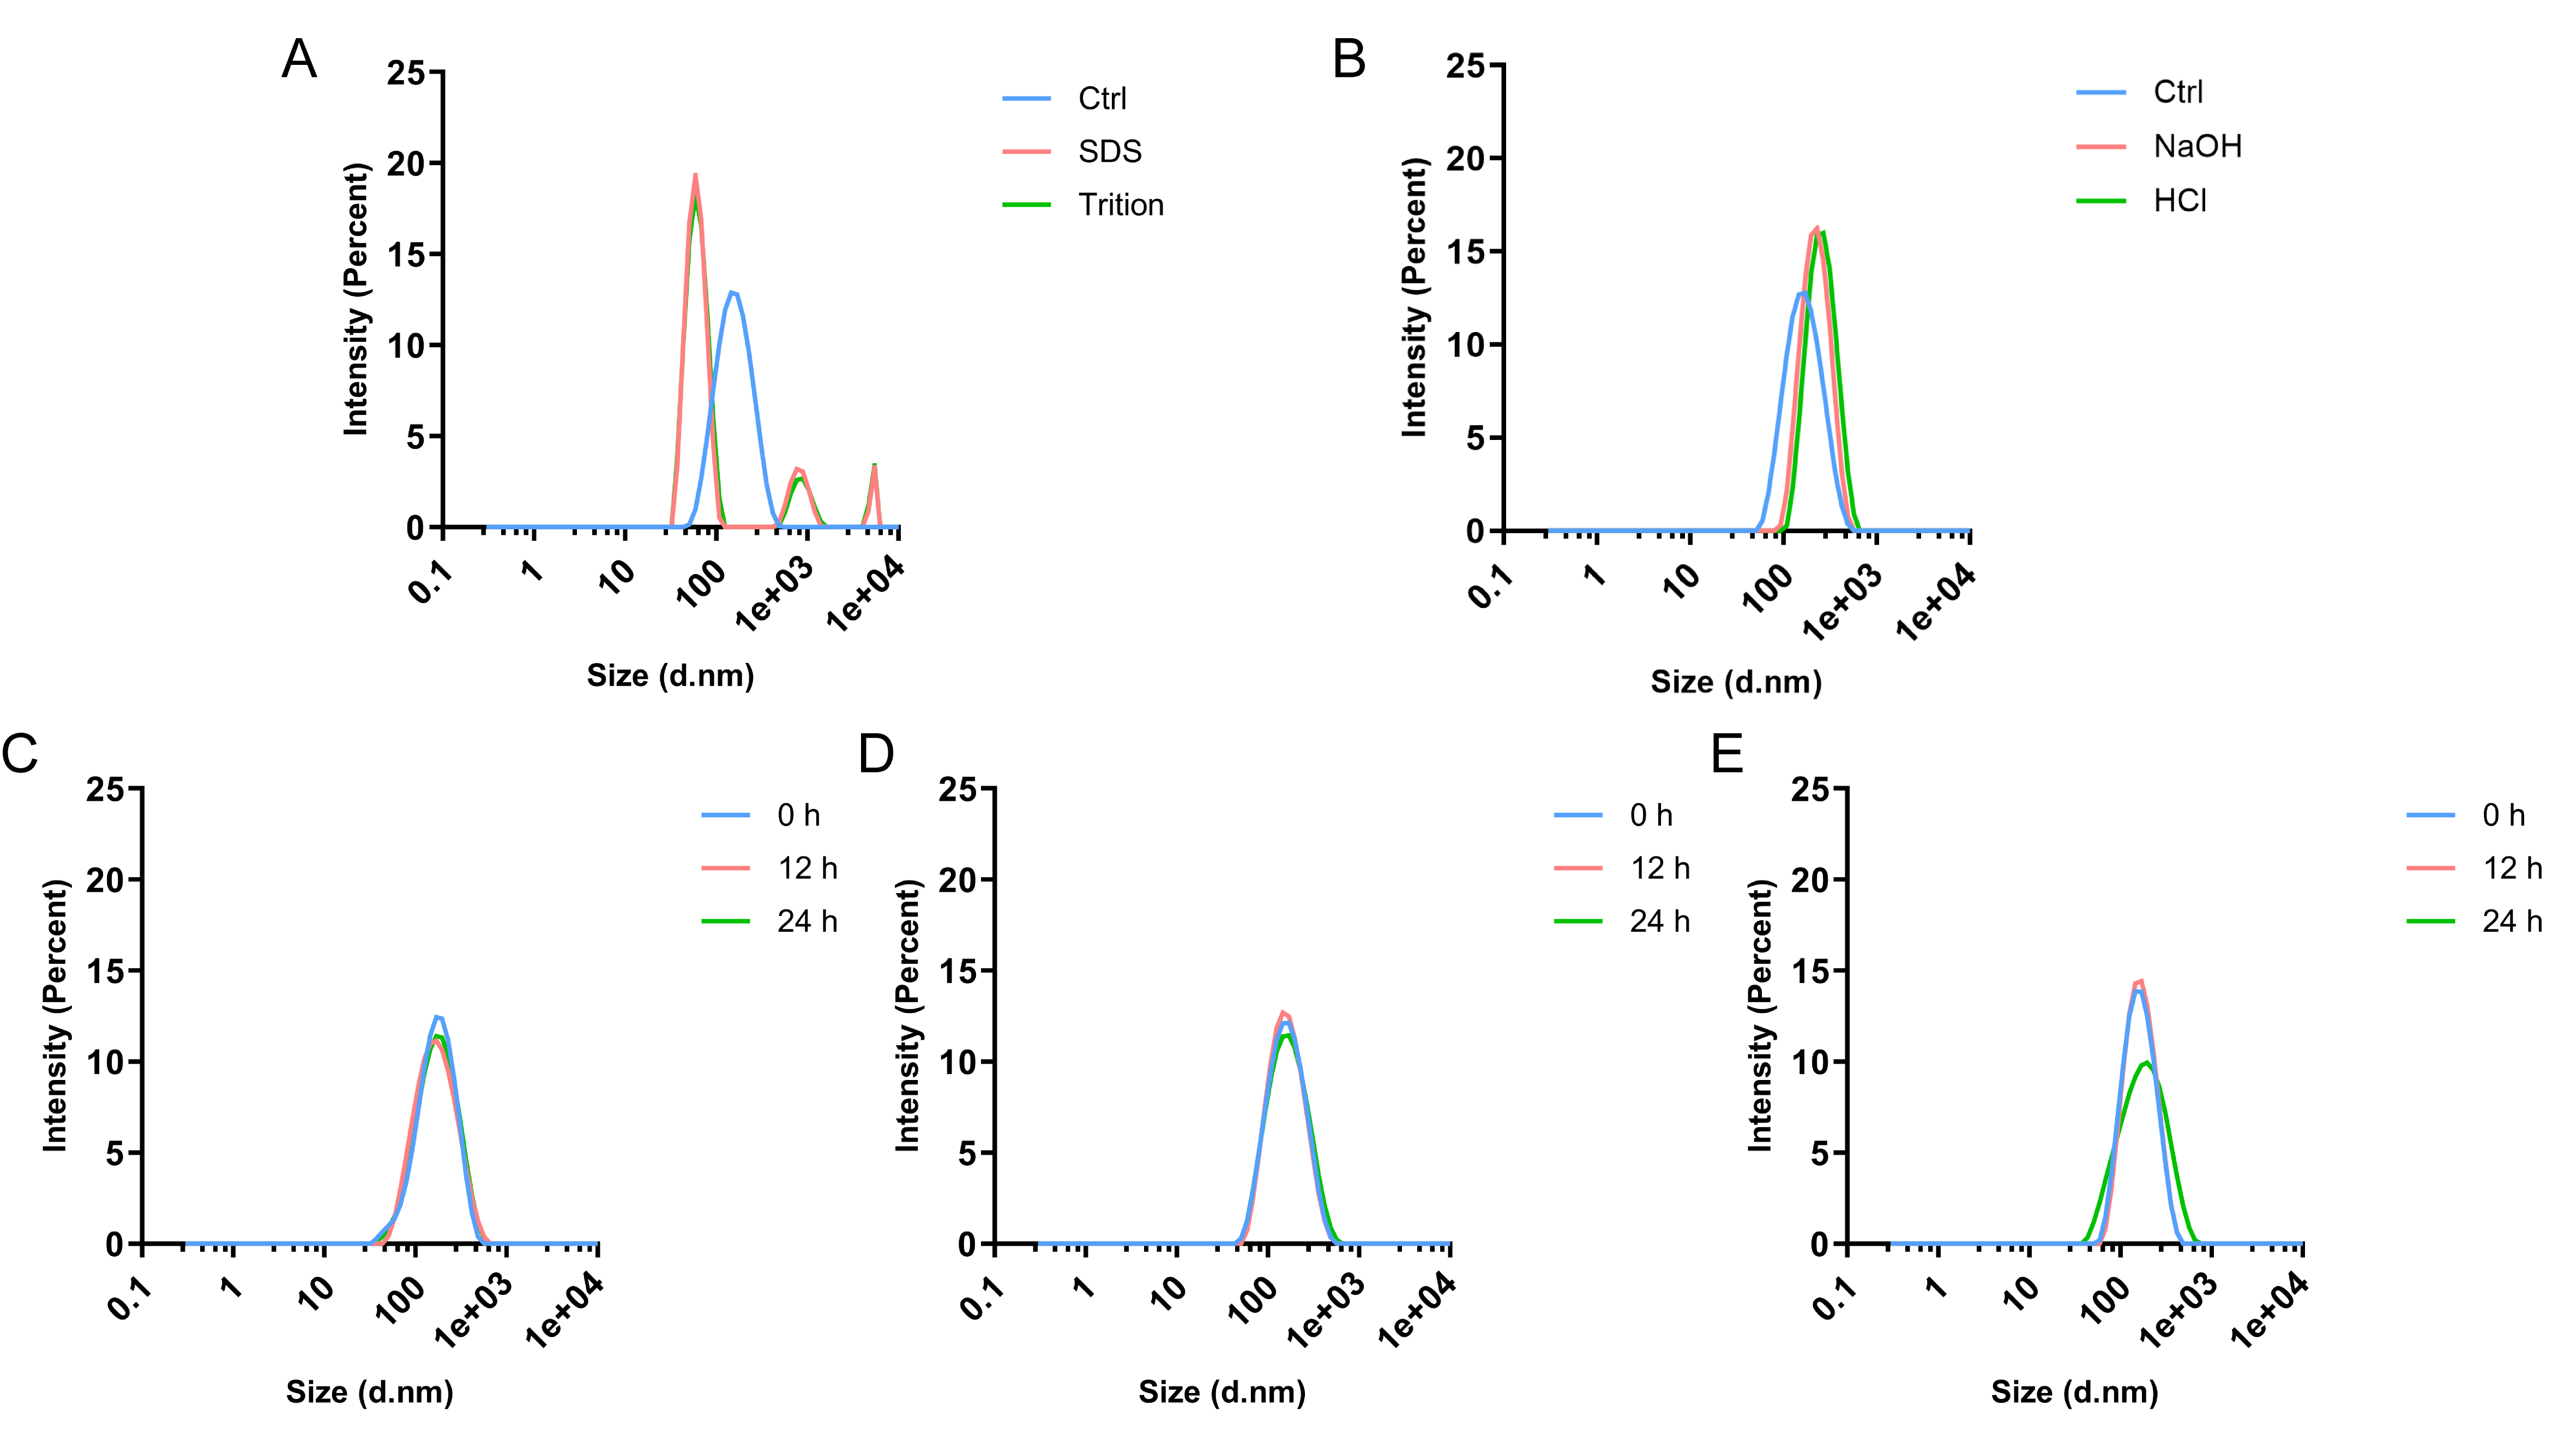
**

**Fig. S3** Changes in SEV particle size under different external conditions. (A) Dynamic light scattering (DLS) was used to assess the changes in particle size distribution after incubation in surfactants. (B) DLS was used to assess the changes in particle size distribution after incubation in different pH conditions. (C) DLS was used to assess the changes in the particle size distribution after incubation in PBS at 37°C for 0 h, 12 h, and 24 hours. (D) DLS was used to assess the changes in the particle size distribution after incubation in small intestine simulating fluid at 37°C for 0 h, 12 h, and 24 hours. (E) DLS was used to assess the changes in the particle size distribution after incubation in stomach simulating fluid at 37°C for 0 h, 12 h, and 24 hours.

**
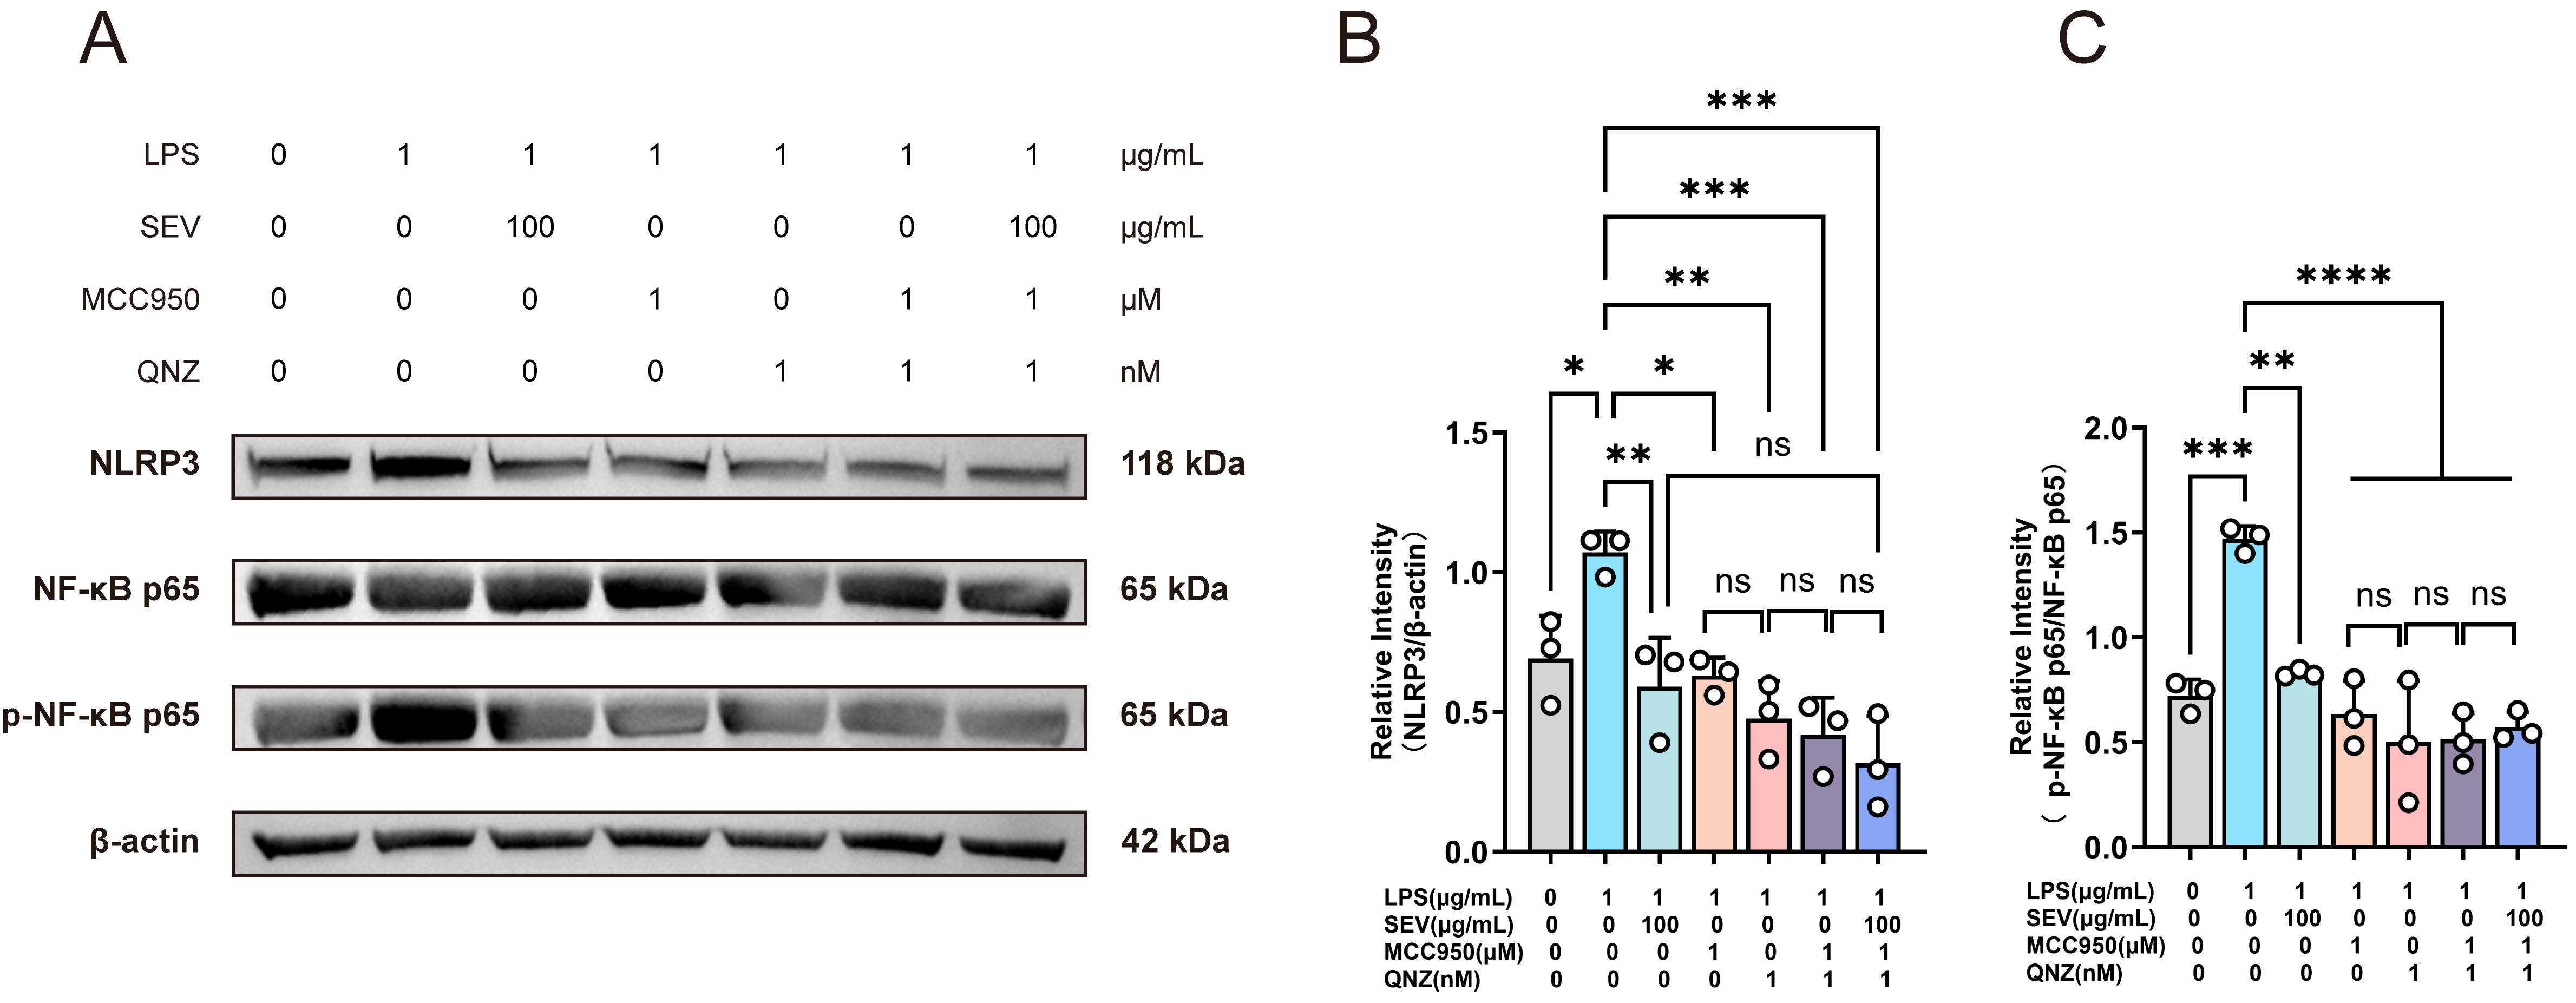
**

**Fig. S4** Inhibitor assays confirmed that SEV ameliorate inflammatory responses in LPS-stimulated RAW264.7 macrophages by specifically modulating the NF‑κB/NLRP3 pathway. QNZ serves as an inhibitor of NF-κB, while MCC950 acts as an inhibitor of NLRP3. (A) Western blot images of NLRP3, total NF-κB p65 and phosphorylated NF-κB p65 expression in LPS-stimulated RAW264.7 macrophages treated with and without SEV, MCC950, QNZ. Representative images from at least 3 independent biological repeats are shown. β-Actin served as a loading control for NLRP3, and total NF-κB p65 protein was used as a loading control for phosphorylated NF-κB p65. (B) Quantification of NLRP3 protein expression level (n=3). (C) Quantification of phosphorylated NF-κB p65 protein expression level (n=3). Data are expressed as mean ± SD. Statistical significance was determined by one‑way ANOVA followed by Tukey’s post hoc test; ns *p* > 0.05, **p* < 0.05, ***p* < 0.01, ****p* < 0.001, *****p* < 0.0001.

**Table. S1** ELISA kits for ELISA assay

| **Name** | **Manufacturer** | **Catalog Number** |
| --- | --- | --- |
| Mouse IL-6 ELISA kit | MultiSciences | 70-EK206/3-96 |
| Mouse IL-1β ELISA kit | MultiSciences | 70-EK201B/4-96 |
| Mouse TNF-α ELISA kit | Cloud-Clone | SEA133Mu |
| Mouse IL-10 ELISA kit | Cloud-Clone | SEA056Mu |

**Table. S2 The sequences used in qPCR**

| **Gene** | **Primer (5’ to 3’)** |
| --- | --- |
| TNF-α | F: TTGTCTACTCCCAGGTTCTCT |
| R: GAGGTTGACTTTCTCCTGGTATG |
| IL-6 | F: CGGAGAGGAGACTTCACAGAG |
| R: CATTTCCACGATTTCCCAGA |
| IL-10 | F: TGCACTACCAAAGCCACAAG |
| R: TCAGTAAGAGCAGGCAGCAT |
| TGF-β | F: GCCATAACCGCACTGTCATT |
| R: AAGGTGGTGCCCTCTGAAAT |
| GAPDH | F: AAGGTCATCCCAGAGCTGAA |
| R: CTGCTTCACCACCTTCTTGA |
| ZO-1 | F: TTCACGCAGTTACGAGCAAG |
| R: TTGGTGTTTGAAGGCAGAGC |
| Claudin-1 | F: TGGTCAGGCTCTCTTCACTG |
| R: TTGGATAGGGCCTTGGTGTT |
| Occludin | F: AAGGGAAGAGCAGGAAGGTC |
| R: TCCAGCTCATCACAGGACTC |
| GAPDH | F: CACCAACTGCTTAGCACCCC |
| R: TGGTCATGAGTCCTTCCACG |

**Table. S3 Antibodies for Western blot and Immunofluorescence**

| **Name** | **Manufacturer** | **Catalog Number** |
| --- | --- | --- |
| Anti-HSP70 Antibody | Proteintech | 10995-1-AP |
| Anti-TET8 Antibody | Abcam | ab70007 |
| Anti-TLR4 Antibody | Santa Cruz | sc-293072 |
| Anti-NLRP3 Antibody | Abcam | ab263899 |
| Anti-NF-κB Antibody | Immunoway | YM8209 |
| Anti-p-NF-κB P65 Antibody | Immunoway | YM8442 |
| Anti-Occludin Antibody | Immunoway | YM8316 |
| Anti-β-actin Antibody | Abcam | ab8227 |
| Anti-MUC2 Antibody | Servicebio | GB11344 |
| Goat anti-mouse IgG（HRP） | Abcam | ab97265 |
| Goat anti-rabbit IgG（HRP） | Abcam | ab205718 |
